# Supplementary material for: Comparative Functional Analysis of 12 Mammalian IFN-λ4 Orthologs
Source: PubMed Central journal article supplement — J Interferon Cytokine Res. 2016 Jan 1;36(1):30–6. doi: 10.1089/jir.2015.0096 (PMC4722605; doi:10.1089/jir.2015.0096), 2016-01-01
Supplement: Supp_Figure1.pdf [file Supp_Figure1.pdf]

## Supplementary Data

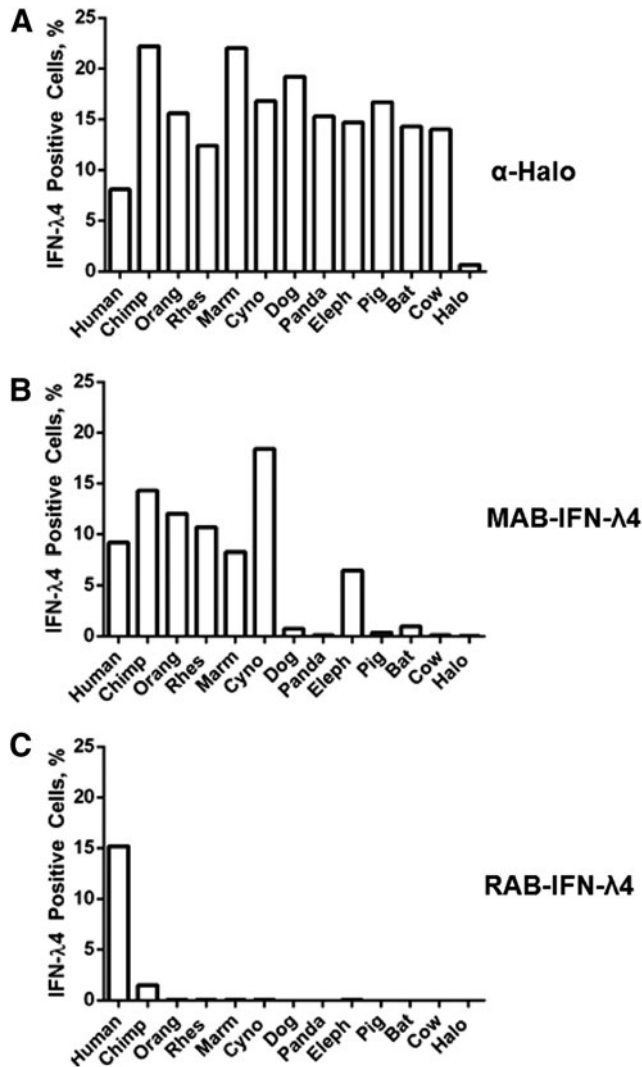

**SUPPLEMENTARY FIG. S1.** Flow cytometry screening for detection of IFN-λ4 orthologs. HepG2 cells were transfected with expression constructs that produce IFN-λ4-Halo orthologs and an empty Halo-tag vector in single replicates. Graphs represent flow cytometry results with corresponding antibodies—α-Halo (A), MAB-IFN-λ4 (B), and RAB-IFN-λ4 (C).
