# Supplementary material for: Comparative Functional Analysis of 12 Mammalian IFN-λ4 Orthologs
Source: PubMed Central journal article supplement — J Interferon Cytokine Res. 2016 Jan 1;36(1):30–6. doi: 10.1089/jir.2015.0096 (PMC4722605; doi:10.1089/jir.2015.0096), 2016-01-01
Supplement: Supp_Figure2.pdf [file Supp_Figure2.pdf]

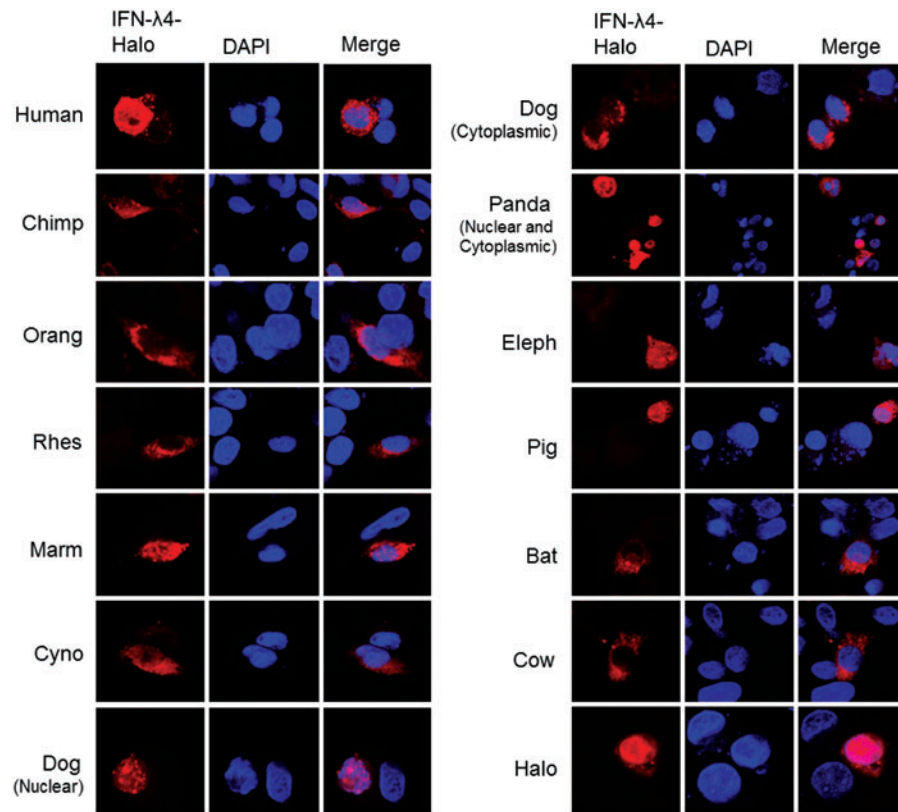

**SUPPLEMENTARY FIG. S2.** Confocal imaging of IFN- $\lambda$ 4 orthologs. HepG2 cells were transfected with expression constructs that produce IFN- $\lambda$ 4-Halo orthologs and an empty Halo-tag vector in single replicates. Representative confocal images of cells stained with fluorescent Halo ligand show predominantly cytoplasmic expression of IFN- $\lambda$ 4-Halo orthologs; both cytoplasmic and nuclear expression was detected in dog and panda (and possibly in pig). Red staining—IFN- $\lambda$ 4-Halo, blue—nuclei (DAPI).
