# Supplementary material for: Comparative Functional Analysis of 12 Mammalian IFN-λ4 Orthologs
Source: PubMed Central journal article supplement — J Interferon Cytokine Res. 2016 Jan 1;36(1):30–6. doi: 10.1089/jir.2015.0096 (PMC4722605; doi:10.1089/jir.2015.0096), 2016-01-01
Supplement: Supp_Figure3.pdf [file Supp_Figure3.pdf]

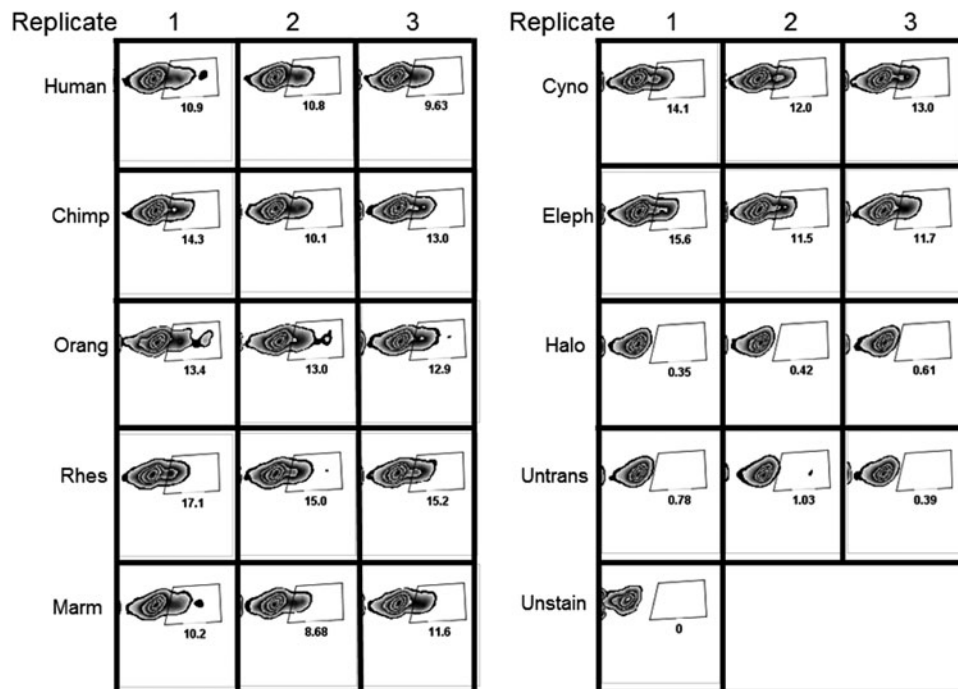

**SUPPLEMENTARY FIG. S3.** Flow cytometry for IFN- $\lambda 4$  orthologs with MAB-IFN- $\lambda 4$ . Flow cytometry images of HepG2 cells transfected in triplicates with expression constructs that produce IFN- $\lambda 4$ -Halo orthologs. Negative controls—cells transfected with empty Halo-tag vector, untransfected, and unstained cells. Staining was done with the MAB-IFN- $\lambda 4$ . Representative images and summary plots are presented in Fig. 4.
