# Supplementary material for: Comparative Functional Analysis of 12 Mammalian IFN-λ4 Orthologs
Source: PubMed Central journal article supplement — J Interferon Cytokine Res. 2016 Jan 1;36(1):30–6. doi: 10.1089/jir.2015.0096 (PMC4722605; doi:10.1089/jir.2015.0096), 2016-01-01
Supplement: Supp_Table1.pdf [file Supp_Table1.pdf]

SUPPLEMENTARY TABLE S1. cDNA AND PROTEIN SEQUENCES OF IFN- $\lambda$ 4 ORTHOLOGS

| Ortholog  | cDNA/protein sequence                                                                                                                                                                                                                                                                                                                                                                                                                                                                                                                                                                                                                                                                                                                                                                                                                                                                                                                                                  |
|-----------|------------------------------------------------------------------------------------------------------------------------------------------------------------------------------------------------------------------------------------------------------------------------------------------------------------------------------------------------------------------------------------------------------------------------------------------------------------------------------------------------------------------------------------------------------------------------------------------------------------------------------------------------------------------------------------------------------------------------------------------------------------------------------------------------------------------------------------------------------------------------------------------------------------------------------------------------------------------------|
| Human     | <p>cDNA:<br/> <u>ATGCGGCCGAGTGTCTGGGCCGACAGTGGCCGCGGGGCTGTGGGTCCTGTGCACGGTGATCGCAGCGGC</u><br/>           CCCCCGGCGCTGCCTGCTCTCGCACTACCGCTCGCTGGAGCCCCGGACGCTGGCGGGCTGCCAAGGCG<br/>           CTGAGGGACCGCTACGAGGAAGAGGCGCTGAGCTGGGGGACGCGCAACTGCTCCTTCCGCCCCAG<br/>           GAGGGATCCTCCGCGGCCATCGTCTGCGCTCGGCTCCGCCACGTGGCCCCGGGGCATCGCGGACGCC<br/>           CAGGCAGTGCTCAGCGGCCTGCACCGCTCGGAGCTGCTCCCCGGCGCCGGCCGATCCTGGAGCTG<br/>           CTGGCGCCGCGGGGAGGGATGTGGCGGCCTGCCTTGAGCTGGCACGGCCAGGCTCCTCCAGGAAG<br/>           GTCCCCGGGGCCAGAAGAGGCGTCAAAACCCGAGAGCGGACTCGCCTCGGTGCCGCAAAGC<br/>           CAGCGTGGTCTTCAACCTCCTGCGCCTGCTACGTGGGAGCTCCGGCTGGCTGCA-<br/>           CACTCTGGGCCTGCCTCTGA</p> <p>Protein:<br/>           MRPSVWAAVAAGLWVLCTVIAAAPRRCLLSHYRSLEPRTLAAAKALRDRYEEEEALSWGQRNCSFRPRRD<br/>           PPRSSCARLRHVARGIADAQAVLSGLHRSELLPGAGPILELLAAAGRDVAACLELARPGSSRKVPGAQK<br/>           RRHKPRRADSPRCRKASVVFNLLRLLTWELRLAAHSGPCL*</p>   |
| Chimp     | <p>cDNA:<br/> <u>ATGCGGCCGAGTGTCTGGGCCGACAGTGGCCGCGGGGCTGTGGGTTCTGTGCACGGTGGTTCGACGCGGC</u><br/>           CCCCCGGCGCTGCCTGCTCTCGCACTACCGCTCGCTGGAGCCCCGGACGCTGGCGGGCTGCCAAGGC<br/>           GCTGAGGGACCGCTACGAGGAAGAGGCGCTGAGCTGGGGGACGCGCAACTGCTCCTTCCGCCCCAG<br/>           GAGGGATCCTCCGCGGCCGCTGCTCCTGCGCTCGGCTCCGCCACGTGGCCCCGGGGCATCGCGGACGCC<br/>           CAGGCAGTGCTCAGTGGCCTGCACCGCTCGGAGCTGCTCCCCGGCGCCGGCCGATCCTGGAGCTGC<br/>           TAGCGGCCGCGGGGAGGGATGTGGCGGCCTGCCTTGAGCTGGCACGGCCAGCCCCCTCCAGGAAGG<br/>           TCCCCGGGGCCAGAGGAGGCGTCAAAACCCGAGAGCTGACTCGCCTCGGTGCCGGAAGCCAG<br/>           CGTGATCTTCAACCTCCTGCGCCTGCTACGTGGGAGCTCCGGCTGGCTGCACACTCAGGGCCTTG<br/>           CCTCTGA</p> <p>Protein:<br/>           MRPSVWAAVAAGLWVLCTVVAAPRRCLLSHYRSLEPRTLAAAKALRDRYEEEEALSWGQRNCSFRPRRD<br/>           PPRSSCARLRHVARGIADAQAVLSGLHRSELLPGAGPILELLAAAGRDVAACLELARPPSRKVPGAQR<br/>           RRHKPRRADSPRCREASVVFNLLRLLTWELRLAAHSGPCL*</p>  |
| Orangutan | <p>cDNA:<br/> <u>ATGCGGCCGAGTGTCTGGGCCGACAGTGGCCGCGGGGCTGTGGGTCCTGTGCACGGTGGTTCGACGCGG</u><br/>           CCCCCAGCGCTGCCTGCTCTCGCACTACCGCTCGCTGGAGCCCCGGACGCTGGCGGGCGGTCAA<br/>           GGCGCTGAGGGACCGCTACGAGGAAGAGGCGCTGAGCTGGGGACCGCGCAACTGCTCCTTCCGCC<br/>           CAGGAGGGATCCTCCGCGGCCGCTGCTCCTGCGCTCGGCTCCGCCACGTGGCCCCGGGGCATCGCGGA<br/>           CGCCAGCCGCTGCTCAGCGGCCTGCACCGCCGAGCTGCTTCCCGCACCGTCCCGATCCTGGA<br/>           GCTGCTGGCGCCGCGGGGAGGGATGTGGCGGCCTGCCTTGAGCTGGCACGGCCAGGCTCCTCCAG<br/>           GAAGGTCCCCGGGGCCAGAGGAGGCGTCAAAACCCGCGGAGAGCTGACTTGCCTCGGTGTCGCG<br/>           AAGCCAGCGTGGTCTTCAACCTCCTGCGCCTGCTACGTGGGAGCTCCGGCTGGCTGCACACTCT<br/>           GGGCCTTGCCCTCTGA</p> <p>Protein:<br/>           MRPSVWAAVAAGLWVLCTVVAAPQRCLLSHYRSLEPRTLAAVKALRDRYEEEEALSWGPRNCSFRPRRD<br/>           PPRSSCARLRHVARGIADAQAVLSGLHRPELLPGTVPILLELLAAAGRDVAACLELARPGSSRKVPGAQR<br/>           RRHKPRRADLPRCREASVVFNLLRLLTWELRLAAHSGPCL*</p> |
| Rhesus    | <p>cDNA:<br/> <u>ATGCGGCCGAGTGTCTGGGCCGCGGTGGCCGCGGGGCTGTGGGTCCTGTGCACGGTGGTTCACAGCGG</u><br/>           CCCCCGGCGCTGCCTGCTCTCGCACTACCGCTCGCTGGAGCCCCGGACGCTGGCGGGCGGCCAAG<br/>           GCGCTGAGGGACCGCTACGAGGAAGAGGCGCTGAGCTGGGGAGCCACGCAACTGCTCCTTCCGCC<br/>           CAGGAGGGATCCTCCGCGGCCGCTGCTCCTGCGCTCAGCTCCGCCACGTGGCCCCGGGGCATCGCG<br/>           GACGCCAGGCCGCTGCTCAGCGGCCTGCACCGCCGAGCTGCTCCCCGGCGCCGGCCGATCCTG<br/>           GAGCTGCTGGCGGCCGCGGGGAAGGGCGTGGCGGCCTGCCTCGAGCTGTCACGACCAGACTCCTC<br/>           CAGGAAGGTCCCCGGGGCCCGAGGAGGCGTCAAAACCCGCGGAGAGCTGACTCGCCTCGGTG<br/>           TCGCGAAGTCAGCGTGATCTTCAACCTCCTGCGCCTGCTACGTGGGAGCTCCGACTGGTTGCGCAC<br/>           TCCGGCCCTGCCTCTGA</p> <p>Protein:<br/>           MRPSVWAAVAAGLWVLCTVVAAPRRCLLSHYRSLEPRTLAAAKALRDRYEEEEALRWEPRNCSFRPRRD<br/>           PPRSSCAQLRHVARGIADAQAVLSGLHRPELLPGAGPILELLAAAGKGVAAACLELRPDSRRKVPGAPR<br/>           RRHKPRRADSPRCREASVVFNLLRLLTWELRLVAHSGPCL*</p>  |
| Marmoset  | <p>cDNA:<br/> <u>ATGCGGCCAAGTGTGCGCGGCCGCGGTGGCTGCGGGGCTGTGGGTCCTGTGCACGGTGGGTGCGGCGGC</u><br/>           CCCCCGGCGCTGCCTGCTCTCCCACTACCGCTCGCTGGAGCCCCGGACGCTGGCAGCGGCCAAGGC<br/>           GCTGAGGGACCGCTACGAGGAAGAGGCGCTGAGCTGGGGTTCGCGCAACTGCTCCTTCCAGCCAG<br/>           GAGGGATCCTTTGCGGCCGCTGCTCCTGCGCTGGCTCCGACACGTGGCCCCGAGGCATAGCGGACGCC<br/>           CAGGCGGTGCTCAGCCGCTGCACCGCCGAGCTGCTCCCCGGCGCCGGCCGATCCTGGAGCT<br/>           GCTGGCGGCCGCGGGGAGGGACGTGGCGGCCTGTCTCGAGCTGGCCCCGGCCGACTCCTCCAG<br/>           GAAGGTCCCCGGGGCCCGAGGAGGCGTCAAAACCCGCGGAGACCTGACTCGCCTCGGTGCCG<br/>           GAAGCCGAGTGGTCTTCAACCTCCTGCGCCTGCTACGTGGGAGCTCCGGCTGGCGGCGCACTCA<br/>           GGACCTTGCCCTCTGA</p> <p>Protein:<br/>           MRPSVAAAVAAGLWVLCTVGAAPRRCLLSHYRSLEPRTLAAAKALRDRYEEEEALSWGSRNCSFHPR<br/>           RDLRPPSSCAWLRHVARGIADAQAVLSRLHRPELLPGAGPILELLAAAGRDVAACLELARPDSSRKVPG<br/>           APRRRHKPRRPDSPRCREARVVFNLLRLLTWELRLAAHSGPCL*</p>    |

(continued)

SUPPLEMENTARY TABLE S1. (CONTINUED)

| <i>Ortholog</i> | <i>cDNA/protein sequence</i>                                                                                                                                                                                                                                                                                                                                                                                                                                                                                                                                                                                                                                                                                                                                                                                                                                                                                                                                                              |
|-----------------|-------------------------------------------------------------------------------------------------------------------------------------------------------------------------------------------------------------------------------------------------------------------------------------------------------------------------------------------------------------------------------------------------------------------------------------------------------------------------------------------------------------------------------------------------------------------------------------------------------------------------------------------------------------------------------------------------------------------------------------------------------------------------------------------------------------------------------------------------------------------------------------------------------------------------------------------------------------------------------------------|
| Cynomolgus      | <p>cDNA:<br/> <u>ATGCGGCCGAGTGTCTGGGCCGCGGTGGCCCGGGGCTGTGGGTCTGTGCACGGTGGTCACAGCG</u><br/>           GCCCCCCGGCGCTGCCTGCTCTCGCACTACCGCTCGCTGGAGCCCCGGACGCTGGCGGGCGGCCAAGG<br/>           CGCTGAGGGACCGCTACGAGGAAGAGGCGCTGAGATGGGAGCCGCGCAACTGCTCCTTCCGCC<br/>           CAGGAGGGATCCTCCGCGGCCGTCGCTCCTGCGCTCAGCTCCGCCACGTGGCCCCGGGGCATCGCGGAC<br/>           GCCAGGCCGTGCTCAGCGGCCTGCACCGCCGGAGCTGCTCCCCGGCGCCGCCGATCCTGGAG<br/>           CTGCTGGCGGCCGCGGGGAAGGACGTGGCGGCCTGCCTCGAGCTGTACAGACCAGGCTCCTCCAG<br/>           GAAGTCCCCGGGGCCCCGAGGAGGCGTCACAAACCGCGGAGAGCTGACTCGCCTCGGTGTCGCG<br/>           AAGTCAGCGTGATCTCAACCTCCTGCGCCTGCTCACGTGGGAGCTCCGACTGGTTGCCCACTCT<br/>           GGGCCTTGCCCTGA</p> <p>Protein:<br/>           MRPSVWAAVAAGLVVLTCTVVTAAAPRRCLLSHYRSLEPRTLAAAKALRDRYEEALRWEPRNCSFRPRRD<br/>           PPRSSCAQLRHVARGIADAQAVLSGLHRPELLPGAGPILELLAAAGKDVAAACLESRPGSSRKVPGAPR<br/>           RRHKPRRADSPRCREVSIVFNLLRLLTWELRLVAHSGPCL*</p>                        |
| Dog             | <p>cDNA:<br/> <u>ATGGGGCCGCGGGGCGCAGCCGCGGTGGCCGTGGCGCTGTGGGTGCTGGTGGCGGGCGGGCGACGCGG</u><br/>           CGGAGCCTGGCGCGGCGACGCCCGGGCGCTGCCTCCTGTGCACTACCGCTCGCTGGACCCCAGGG<br/>           CGTGGCGGCCGTC AAGGCGCTGCGGGACCGCTACGAGGAGGCCACGCTGAGCTGGCGGCCGCG<br/>           AACTGCTCCTTCCGCCCCGAGGAGGGATCCTCCGCGGCCCTGGTTCGTGCGCGCGCCTCCGCCGGGT<br/>           GGCCCGGGCCTGGAGGACGCCAGGCCGTGCTGAGCCGCTGCGGAGCCCCGAGAGGTTGCCCGG<br/>           CACCGCCCCGACCTGGAGCTGCTGGCGGGCGCGCGGGGACGCTGGGGGCCCTGCCTCGAGCTGGC<br/>           CCGGCCAGGCTCCCGGGGCAAGTCCGTGCGGCCACCGAGGAGGCGTCCCCAGAGCGGAGAGCT<br/>           GACTCGCCTCGGTGCCACGAAGCCAGCGTGATCTCAACCTCCTGCGCCTGCTCACGAGGGACCTGA<br/>           GGCTGGTGGCGGACTCCGGGCCCTGTCTCTGA</p> <p>Protein:<br/>           MGPRGAAVAVALWVLVAAGDAAEPGAATPRRCLLSHYRSLDPRALAAVKALRDRYEEATLSWRPRNC<br/>           SFRPRRDPPRPWSCARLRRVARGLEDAQAVLSRLRSPERLPGTPTLELLAAARRDVGACLELARPGSR<br/>           GKSVRPPRRRQRRRADSPRCHEASVIFNLLRLLTRDLRLVADSGPCL*</p> |
| Panda           | <p>cDNA:<br/> <u>ATGGGACCGACGGGCGCAGCCGCGGTGGCCGTGGCGCTGTGGGTCTTGGTGACGGAGGGCGAGGCG</u><br/>           GCGGACCCTGGCGTGGCGACGCCCGGGCGCTGCCACCTGTCACTACCGCTCGCTGGACCCCAG<br/>           GCGCTGGCGGCCGTC AAGGCGCTGAGGGACCGCTACGAGGACGAGACGCTGAGCTGGAGGCCGCG<br/>           CAACTGCTCCTTCCGCCAAGGAAGGATCCTCCGCGGCCCTGGTTCGTGTGCGCGCCTCCGCTTCC<br/>           TAGTCCGGAGCCTAGCGGACGCCAGGCCGCTGCTGAGCCGCTGCCGAGCCCCGAGCGGTTCCCGG<br/>           GCACCCGCCCGACCTGGAGCTGCTGGCGGGCGCGGGGACGCTGGGGCCTGCCTGGAGCT<br/>           GTTCCGGCCGGGCTCCTGGAGGAAGTCCCTGCGGCCACCGAGGAGGCGTCCCCAAACACGGAGAG<br/>           CTGACTCGCCTCGGTGCTACGAAGCCAGCGTCATCTTACGCTCCTGCGCCTGCTCACGTGGGACCTG<br/>           AAGCTGGTGGCGAGCTCGGGGCCCTGTCTCTGA</p> <p>Protein:<br/>           MGPTGAAVAVALWVLVTEGEAADPGVATPRRCHLSHYRSLDPRALAAVKALRDRYEEATLSWRPRNCS<br/>           FRPRKDPRPWSCARLRFVVRSLADAQAVLSRLRSPERFPGTRPTLELLAAARRDVGACLELVRPGSWRK<br/>           SLRPPRRRQTRRADSPRCYEASVIFNLLRLLTWDLKLVASSGPCL*</p>     |
| Elephant        | <p>cDNA:<br/> <u>ATGGGCTCGAACGTCGGTGGCCGCGGTGGCCGTGGGGCTGTGGGTCTTGGTGACCGTGGGCGTGGCAGC</u><br/>           GGAGCCAGTCTGCAGGAGCCCCGACCCTGCCTCCTGTCACTATCGTCTGCTGGACCCCAGGGG<br/>           GCTGGCGCGGTC AAGGCGCTGAGGGACCGCTACGAGGAAGAGGCGCTGAGGTGGGGGCCGCG<br/>           CAACTGCTCCTTCCGCTCCGAAGAAGGAGCCGCCAGGCCCGCTCCTGTGCGCGGCTCCGCTGTG<br/>           GTGGCGCGGCGCCTCGCGACGCCAGGCACTGCTGAGCAGCCTGCGCAGCCTGGAGCTGCTCCC<br/>           CCGGACCCGCCCGACCTGGAGCTGCTGGCGGGCGCAGGGCGCGACGCTGGGGGCCCTGCCTGGAGC<br/>           TGGTTCGGCCGGGCTGGTCCAGGAAGTCCCTCCGACCAAGGAGGCCACAAAGCACGGAGAG<br/>           CTGAATCGCCTCAGTGGCGGAACCCAGGTCATCTTCAATCTCCTGCGCCTGCTCACGTGGGACCT<br/>           CAGGCTGGTGGCACTTTCGGGGCCTTGCGTCTGA</p> <p>Protein:<br/>           MGSNVGA AVAVGLWVLVTGVAAEPVVQEPRLLSHYRSLDPGALAAVKALRDRYEEALRWGPRNC<br/>           SFRLRRREPPRPASCARLRVVARGLADAQAVLSRLRLELLPGTRRTLELLAAAGRDVGACLELVRPGWS<br/>           RKSLRPPRRRHKARRAESPOCREPTVIFNLLRLLTWDLRLVALSGPCV*</p>      |
| Pig             | <p>cDNA:<br/> <u>ATGGGACACGTTGGCACAGCCGCGGTGGCTATGGGACTGTGGGTCTTGTGACGGCGGCTTTCGCGTTG</u><br/>           GACCTGAAGACGTTGGTGGTGGCCGGTGCCTGCGTCTCTCTACTACCGCTCCCTGGACCCCTCAG<br/>           GCGCTGGTGGCCGTC AAGGCGCTGAGGGACCACTATGAGGAAGAGACGCTGAGCTGGAGGCCACG<br/>           CAACTGCTCCTTCCGCTTGGAGGAGGCCCTCCGCGCCATCGTCTGTGCGCGGCTCCGCTGGT<br/>           GCCCGCGGCTCGCCGACGCCAGGCCGCTGAGCAGCCTGCCGAGCCCCGAGCTGTTCCCCCG<br/>           CGTCCGCCCCGACCTGGAGCTGCTGGCGGGCGCGGGGACGCTGGCGGCTGTCTGGAGCTGGTC<br/>           CAGCCAGGCTCCGGGAGGAAGTCCCTGCGGCCGCCAGGAGGCGTCACAGAGCTGTGAGTGGAGAC<br/>           TCGCCTCGGTGCCACGAAGCCACCGTCATCTTCAACCTGCTGCGGCTTCTCGCGTGGGACCTGCGG<br/>           CTGGTGGCGCATTCGGGGCCTTGCTCTGA</p> <p>Protein:<br/>           MGPRGTA AVAVMGLWVFTAVFALDPEDVVVPGRCVLSHYRSLDPQALVAVKALRDHYEEETLSWRPRN<br/>           CSFRLRRDPPPPSCARLRLVARGLADAQAVLSLSPPELFPVGPTELLAAARRDVAACLELVQPGS<br/>           GRKSLRPPRRRHRAVSGDSPRCHEATVIFNLLRLLAWDLRLVAHSGPCL*</p>        |

(continued)

SUPPLEMENTARY TABLE S1. (CONTINUED)

| <i>Ortholog</i> | <i>cDNA/protein sequence</i>                                                                                                                                                                                                                                                                                                                                                                                                                                                                                                                                                                                                                                                                                                                                                                                                                                                                                                                                                                                                                                   |
|-----------------|----------------------------------------------------------------------------------------------------------------------------------------------------------------------------------------------------------------------------------------------------------------------------------------------------------------------------------------------------------------------------------------------------------------------------------------------------------------------------------------------------------------------------------------------------------------------------------------------------------------------------------------------------------------------------------------------------------------------------------------------------------------------------------------------------------------------------------------------------------------------------------------------------------------------------------------------------------------------------------------------------------------------------------------------------------------|
| Megabat         | <p>cDNA:<br/> <u>ATGGGGCCGAGGGGCGCAGTCGCGGTGACCGTGGGGCTGTGGGTCTTGGCGACGGTGGCGGGGACC</u><br/>           ACGGCGAGGCTAAGCCCGGGCGCTGCCTCCTCTCGCACTACCGTTCGCTGGACCCAGGGCGCTGG<br/>           AGGCCGTCAAGGCGCTGAGGGACCGCTACGAGGACGAGACGCTAAACTGGAGGCCGCGCAACTGC<br/>           TCCTCCGCCCAAGGAGGGATCCTCCGAGCCCCTCGACCTGCGCGCGGGTCCGCCTGGTGGCGCG<br/>           GGGCCTGGCCGACGCCAGGAGGTGCTGAGCAGCTTGCCGAGCCCCGAGCTGTACCCCGGCGTCAT<br/>           CTCGACCCCTGGAAGTCTGGCCGCGGTGCGGCCGGGACGTGGCCGTCTGCCTGCAGCTGGCGCGGC<br/>           CAGGCTCCTGGAGGAAGTCCCTCCGGCCCCCAGGAGGCGTCGCCAAAGGGGGAGGCCTGACTCGC<br/>           CTCGGTGCCACGAAGCCACCGTCATCTTCAACCTTCTGCGCCTGCTCGCGTGGGACCTGAGGCTGG<br/>           TGGCGCACTCCGGACCTTGCCTCTGA</p> <p>Protein:<br/>           MGPRGAVAVTVGLWVLATVAADHGEAKPGRCLLSHYRSLDPRALEAVKALRDRIYEDETLNWRPRNCSFR<br/>           PRRDPPSPSTCARLRLVARGLADAQEVLSLSPPELYPGVISTLELLAAVRRDVAVCLQLARPGSWRKS<br/>           LRPPRRRRQRGRPDSPRCHEATVIFNLLRLLAWDLRLVAHSGPCL*</p>                                                                          |
| Cow             | <p>cDNA:<br/> <u>ATGGGGCAGA GTGGCACAGC CGCAGCGGTC GTGGGATTGT GGGTCTTGGT GACTGTGGGT</u><br/> <u>GTAGCTGCCA ACCCCAACGT GACTGAGCCT CAGCGCTGCC TCCTCTCACA CTATCGCTCC</u><br/>           TTGGACCCCC GGGCGTGTCT GGCTGTCAAG GCGTGAGGG ACCACTATGA AGAAGAGACG<br/>           CTGAGCTGGG GGCCCAAAA CTGCTCGATC CGCCGAAGA GGAACCCTCC CCGGCCGTCG<br/>           TCCTGTGCGA TGCTCCGCCG GATGGCCCGC GACCTCGCCG ACGCCAGGC CGTGCTGAGC<br/>           AGCCTGCCGA GCCCCGAGCT CTCCCCGGC GTCGGGCAGA CCCTGGAGCT GCTGGCGGCC<br/>           GCGGGGCGG ACGTGGCGGC CTGCCTCGAG CTGGCCCGC CAGGCTCCTG GAGGAGGTCC<br/>           CCGCGGCGGC CCGGGAGGCG TCCCAAGACT CGCCGAGCTG TGAGTGGAGA GTCGCCTCGA<br/>           TGCCACGAAG CCACCGTCAT CTCCACCTC CTGCGCCTGC TCGCGTGGGA CCTGCGGCTG<br/>           GTGGCGCACG CGGGGCCTTG TCTGTGA</p> <p>Protein:<br/>           MGQSGTAAAVVGLWVLVTGVAAANPNVTEPQRCLLSHYRSLDPRALLAVKALRDHYEETLSWGPQNC<br/>           SIRPKRNPSPSSCAMLRRMARDLADAQAVLSLSPPELFPVGGQTLELLAAAGRDVAACLELARPGSWR<br/>           RSPRRPGRRPKTRRAVSGESPRCHEATVIFHLLRLLAWDLRLVAHAGPCL*</p> |
