# Supplementary material for: Comparative Functional Analysis of 12 Mammalian IFN-λ4 Orthologs
Source: PubMed Central journal article supplement — J Interferon Cytokine Res. 2016 Jan 1;36(1):30–6. doi: 10.1089/jir.2015.0096 (PMC4722605; doi:10.1089/jir.2015.0096), 2016-01-01
Supplement: Supp_Table2.pdf [file Supp_Table2.pdf]

SUPPLEMENTARY TABLE S2. PSORT II ANALYSIS OF IFN- $\lambda$ 4 ORTHOLOGS

| <i>Ortholog</i> | <i>Nuclear localization signals</i>                                                                                                                                              | <i>Localization prediction</i>                                                                                                                    |
|-----------------|----------------------------------------------------------------------------------------------------------------------------------------------------------------------------------|---------------------------------------------------------------------------------------------------------------------------------------------------|
| Human           | pat4: RPRR (4) at 65<br>pat4: KRRH (3) at 139<br>pat4: RRHK (3) at 140<br>pat4: KPRR (4) at 143<br>pat7: PGAQKRR (3) at135<br>pat7: PRCRKAS (5) at150                            | 69.6%: nuclear<br>13.0%: plasma membrane<br>8.7%: mitochondrial<br>4.3%: cytoplasmic<br>4.3%: vesicles of the secretory system                    |
| Chimp           | pat4: RPRR (4) at 65<br>pat4: RRRH (3) at 139<br>pat4: RRHK (3) at 140<br>pat4: KPRR (4) at 143<br>pat7: PGAQRRR (3) at 135                                                      | 52.2%: mitochondrial<br>30.4%: nuclear<br>8.7%: cytoskeletal<br>4.3%: cytoplasmic<br>4.3%: extracellular, including cell wall                     |
| Orangutan       | pat4: RPRR (4) at 65<br>pat4: RRRH (3) at 139<br>pat4: RRHK (3) at 140<br>pat4: KPRR (4) at 143<br>pat7: PGAQRRR (3) at 135                                                      | 52.2%: mitochondrial<br>26.1%: nuclear<br>13.0%: extracellular, including cell wall<br>4.3%: cytoplasmic<br>4.3%: cytoskeletal                    |
| Rhesus          | pat4: RPRR (4) at 65<br>pat4: PRRR (4) at 138<br>pat4: RRRH (3) at 139<br>pat4: RRHK (3) at 140<br>pat4: KPRR (4) at 143<br>pat7: PGAPRRR (3) at 135<br>pat7: PRRRHKP (5) at 138 | 52.2%: mitochondrial<br>30.4%: nuclear<br>8.7%: cytoskeletal<br>4.3%: cytoplasmic<br>4.3%: extracellular, including cell wall                     |
| Marmoset        | pat4: PRRR (4) at 138<br>pat4: RRRH (3) at 139<br>pat4: RRHK (3) at 140<br>pat4: KPRR (4) at 143<br>pat7: PGAPRRR (3) at 135<br>pat7: PRRRHKP (5) at 138                         | 52.2%: mitochondrial<br>30.4%: nuclear<br>8.7%: cytoskeletal<br>4.3%: cytoplasmic<br>4.3%: extracellular, including cell wall                     |
| Cynomolgus      | pat4: RPRR (4) at 65<br>pat4: PRRR (4) at 138<br>pat4: RRRH (3) at 139<br>pat4: RRHK (3) at 140<br>pat4: KPRR (4) at 143<br>pat7: PGAPRRR (3) at 135<br>pat7: PRRRHKP (5) at 138 | 56.5%: mitochondrial<br>26.1%: nuclear<br>8.7%: cytoskeletal<br>4.3%: cytoplasmic<br>4.3%: extracellular, including cell wall                     |
| Dog             | pat4: RPRR (4) at 71<br>pat4: PRRR (4) at 144<br>pat4: RRRP (4) at 145<br>pat7: PRRRRPQ (5) at 143<br>pat7: PRRRPQR (5) at 144<br>pat7: PQRRRAD (5) at 148                       | 47.8%: nuclear<br>21.7%: extracellular, including cell wall<br>13.0%: mitochondrial<br>8.7%: cytoskeletal<br>4.3%: cytoplasmic<br>4.3%: vacuolar  |
| Panda           | pat4: RPRK (4) at 71<br>pat4: PRRR (4) at 144<br>pat4: RRRP (4) at 145<br>pat7: PRRRRPQ (5) at 143<br>pat7: PRRRPQT (5) at 144                                                   | 47.8%: nuclear<br>13.0%: cytoplasmic<br>13.0%: extracellular, including cell wall<br>13.0%: mitochondrial<br>8.7%: cytoskeletal<br>4.3%: vacuolar |
| Elephant        | pat4: PRRR (4) at 145<br>pat4: RRRH (3) at 146<br>pat4: RRHK (3) at 147<br>pat7: PRRRRHK (5) at 144<br>pat7: PRRRHKA (5) at 145                                                  | 55.6%: endoplasmic reticulum<br>11.1%: cytoplasmic<br>11.1%: Golgi<br>11.1%: nuclear<br>11.1%: mitochondrial                                      |

(continued)

SUPPLEMENTARY TABLE S2. (CONTINUED)

| <i>Ortholog</i> | <i>Nuclear localization signals</i>                                                                                             | <i>Localization prediction</i>                                                                                                                                                             |
|-----------------|---------------------------------------------------------------------------------------------------------------------------------|--------------------------------------------------------------------------------------------------------------------------------------------------------------------------------------------|
| Pig             | pat4: PRRR (4) at 145<br>pat4: RRRH (3) at 146<br>pat4: RRHR (3) at 147<br>pat7: PPRRRHR (5) at 144<br>pat7: PRRRHRA (5) at 145 | 55.6%: extracellular, including cell wall<br>11.1%: vacuolar<br>11.1%: cytoplasmic<br>11.1%: nuclear<br>11.1%: endoplasmic reticulum                                                       |
| Bat             | pat4: RPRR (4) at 69<br>pat4: PRRR (4) at 142<br>pat4: RRRR (5) at 143<br>pat7: PPRRRRQ (5) at 141<br>pat7: PRRRRQR (5) at 142  | 30.4%: nuclear<br>21.7%: mitochondrial<br>17.4%: cytoplasmic<br>13.0%: Golgi<br>8.7%: plasma membrane<br>4.3%: extracellular, including cell wall<br>4.3%: cytoskeletal                    |
| Cow             | pat4: RPKR (4) at 71<br>pat4: RRPK (4) at 146<br>pat7: PGRRPKT (4) at 144<br>pat7: PKTRRAV (5) at 148                           | 47.8%: nuclear<br>17.4%: cytoplasmic<br>13.0%: mitochondrial<br>8.7%: plasma membrane<br>4.3%: vesicles of the secretory system<br>4.3%: extracellular, including cell wall<br>4.3%: Golgi |

PSORT II (<http://psort.hgc.jp/>) uses the following two rules to detect NLS: 4 residue pattern (called 'pat4') comprising 4 basic amino acids (K or R) or comprising three basic amino acids (K or R) and either H or P; the other (called 'pat7') is a pattern starting with P and followed within 3 residues by a basic segment containing 3 K/R residues of 4.
